# Supplementary material for: Increased Expression of Maturation Promoting Factor Components Speeds Up Meiosis in Oocytes from Aged Females
Source: Int J Mol Sci. 2018 Sep 19;19(9):2841. doi: 10.3390/ijms19092841 (PMC6164426; doi:10.3390/ijms19092841)
Supplement: Supplementary file 1 [file ijms-19-02841-s001.pdf]

Supplementary Material:

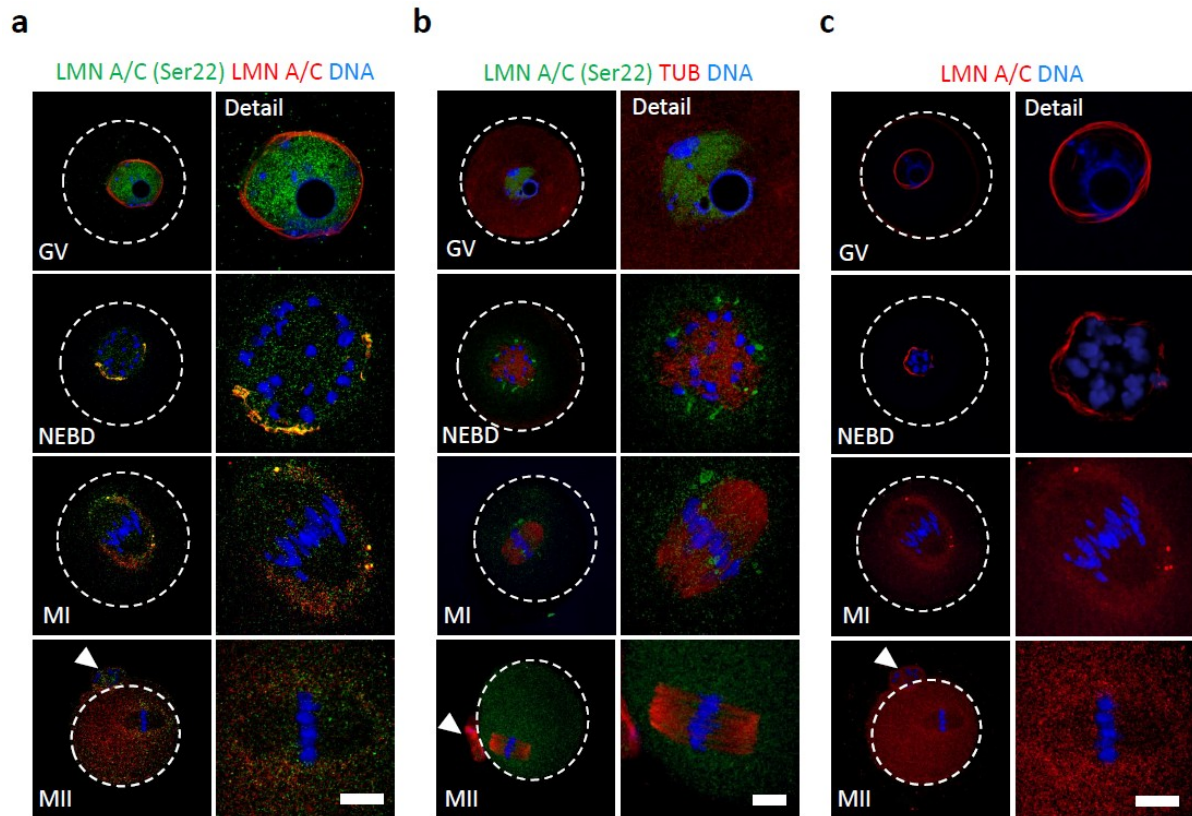

**Figure S1.** Localization of LMN A/C during oocyte maturation. (a) Representative confocal images from immunocytochemistry (ICC) showed localization of LMN A/C (red) and phosphorylated LMN A/C Ser22 (green) during oocyte maturation (GV 0 h; NEBD 3 h; MI 6 h, MII 12 h). Cortex of oocytes is depicted by white dashed line. DNA, blue and scale bar, 10  $\mu\text{m}$ . (b) Co-localization of LMN A/C (Ser22) (green) and the spindle (tubulin, red). DNA, blue and scale bar 10  $\mu\text{m}$ . (c) Localization of LMN A/C (red) during oocyte meiotic maturation. DNA, blue and scale bar 10  $\mu\text{m}$ . Arrowhead marks polar body.

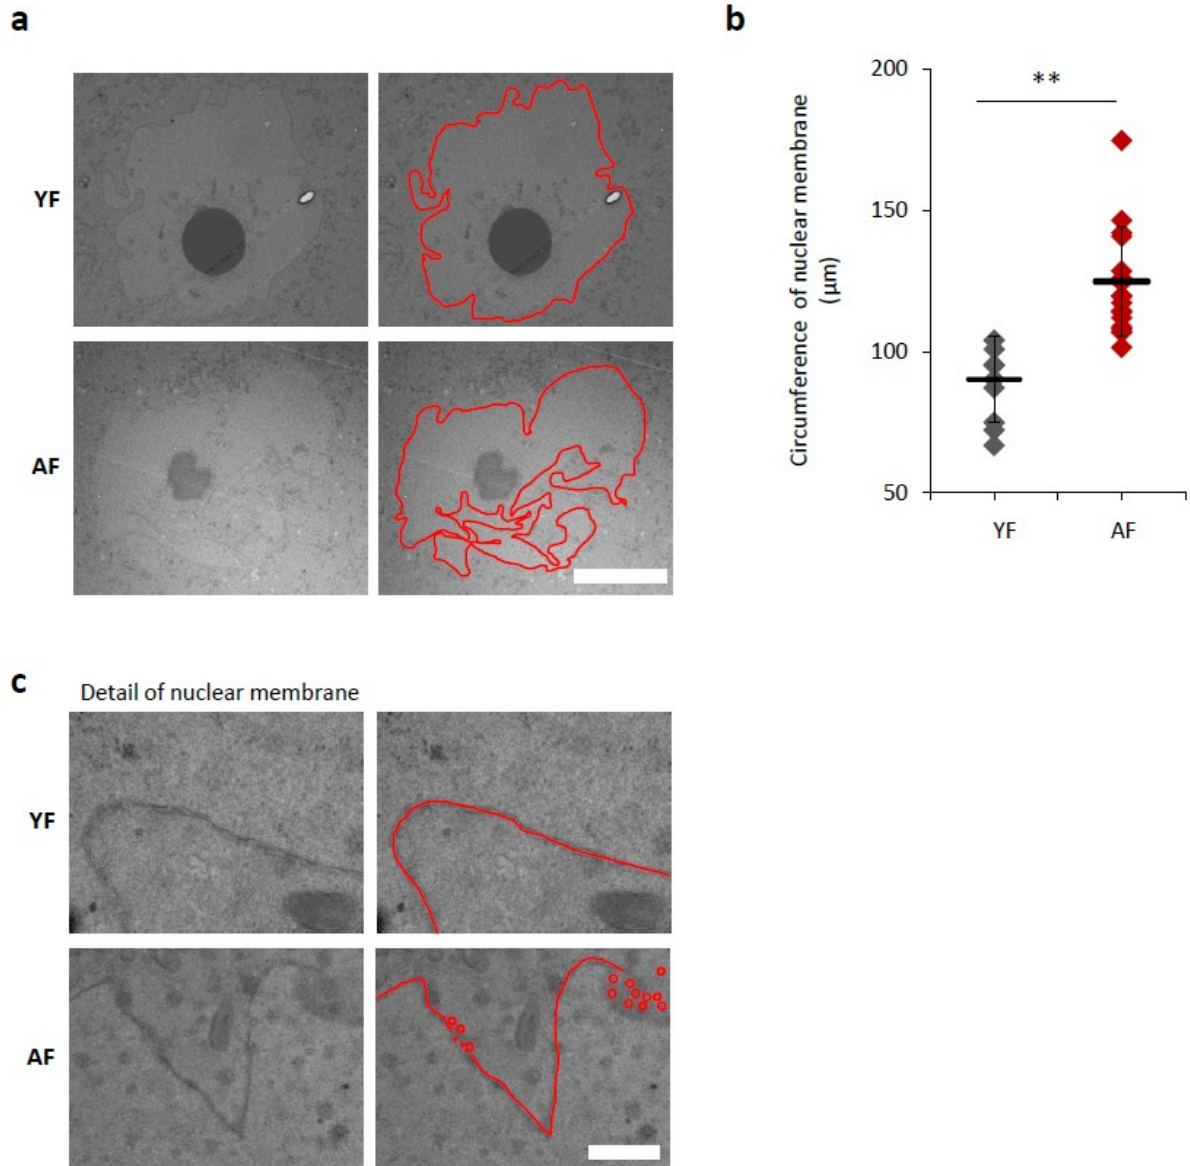

**Figure S2.** Transmission electron microscopy of oocyte nuclei from females of different age. **(a)** Representative images of the nucleus from YF and AF oocytes. The images in the right panels show nuclear membrane highlighted with red line. Scale bar 10  $\mu\text{m}$ . **(b)** Measurement of nuclear membrane circumference of oocytes from the YF and the AF group. From two experiments of biologically different samples ( $n \geq 8$ ). Data represent mean  $\pm$  SD. \*\*  $p < 0.01$ , Student's  $t$ -test. **(c)** Detail of nuclear lamina from AF and YF oocytes. Representative images are from two experiments from biologically different samples (bar, 1  $\mu\text{m}$ ). The images in the right panels show nuclear membrane highlighted with red line.

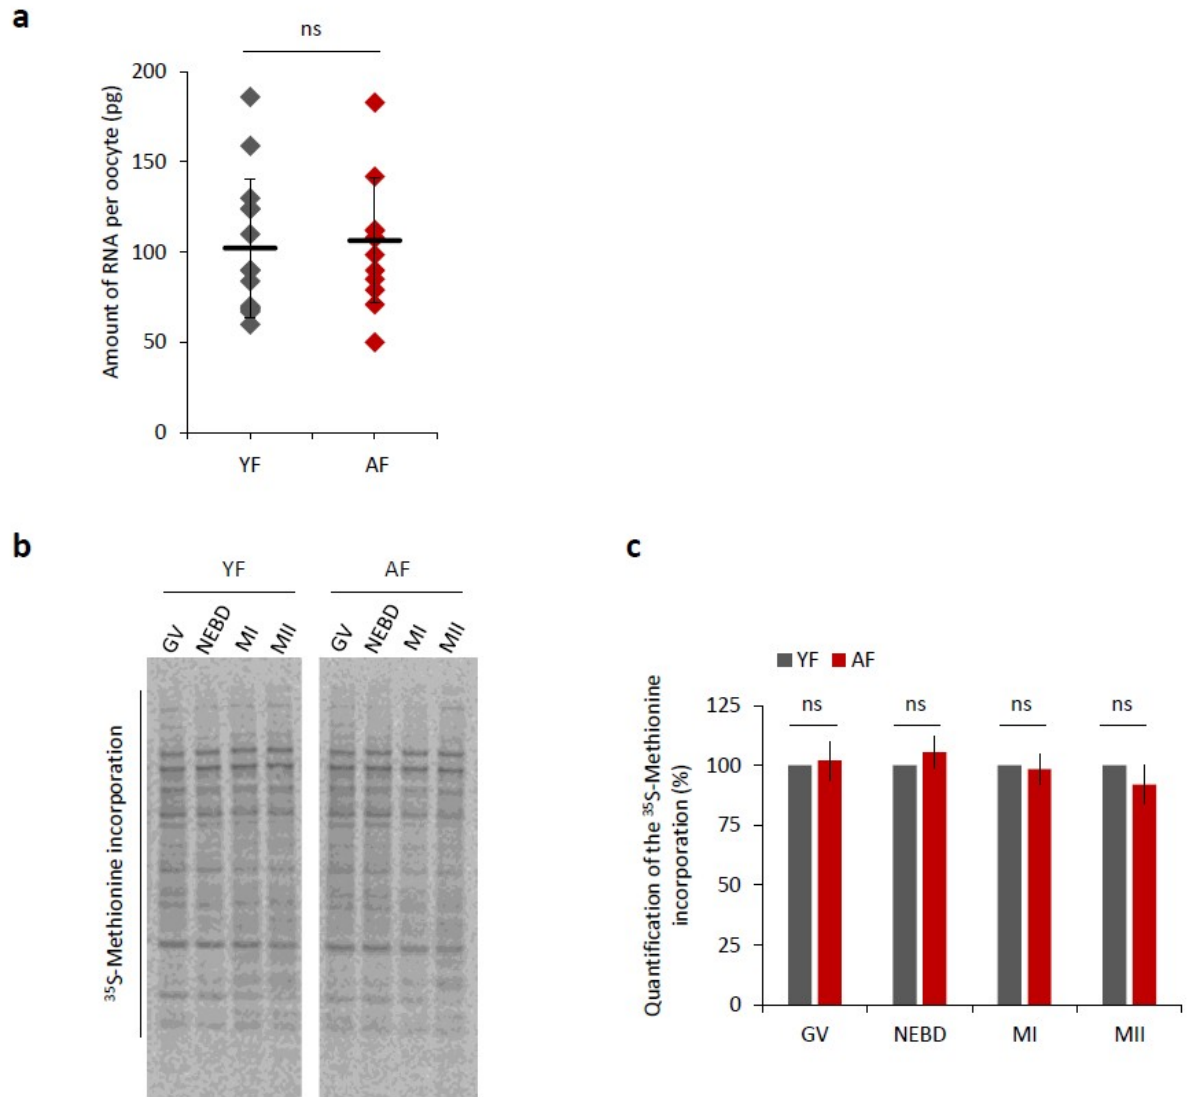

**Figure S3.** Total RNA amount and global translational activity is not different between YF and AF groups. **(a)** Quantification of total RNA by Agilent 2100 Bioanalyzer in the oocytes from different age groups. From 10 experiments of biologically different samples. Data represent mean  $\pm$  SD. ns, non-significant, Student's *t*-test. **(b)** <sup>35</sup>S-Methionine incorporation during meiotic progression of oocytes from YF and AF groups. Representative images are from three experiments of biologically different samples. **(c)** Quantification of <sup>35</sup>S-Methionine incorporation in the oocytes from different groups. From three experiments of biologically different samples. Values obtained for the YF group were set as 100%. Data represent mean  $\pm$  SD, ns, non-significant, Student's *t*-test.

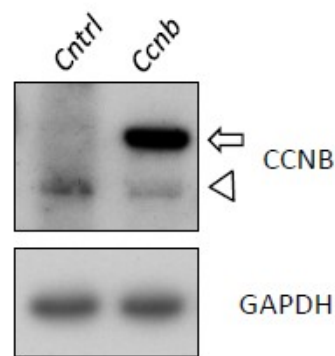

**Figure S4.** Induced expression of the CCNB in the oocytes. Oocytes injected with control *Gfp* (*Cntrl*) and *Ccnb* RNA. See Figure 6a for the effect of the overexpression. WB analysis of samples using CCNB antibody. Arrowhead depicts endogenous CCNB and arrow GFP tagged CCNB protein. GAPDH was used as a loading control. From three experiments of biologically different samples.

**Table S1.** Primary antibodies used for WB and ICC in the study.

| Primary antibodies | Cat. No., company                   | Western Blot (WB) | Immunocytochemistry (ICC) |
|--------------------|-------------------------------------|-------------------|---------------------------|
| Acetylated Tubulin | T6793, Sigma-Aldrich                | not used          | 1:150                     |
| CDK1               | MA5-11472, Thermo Fisher Scientific | 1:500, 1% milk    | not used                  |
| CDK1 (Thr161)      | 9114, Cell Signalling Technology    | 1:500, 1% milk    | not used                  |
| CREST              | HCT-0100, ImmunoVision              | not used          | 1:1000                    |
| Cyclin B           | MS-338-PO, Thermo Fisher Scientific | 1:500, 1% milk    | not used                  |
| GAPDH              | G9545, Sigma-Aldrich                | 1:30000, 1% milk  | not used                  |
| Lamin A/C          | SAB4200236, Sigma-Aldrich           | 1:2000, 1% milk   | 1:150                     |
| Lamin A/C (Ser 22) | 2026, Cell Signalling Technology    | 1:500, 1% milk    | 1:150                     |

**Table S2.** Primers used for RT-PCR.

| Official symbol (gene) | Forward 5' - 3'        | Reverse 5' - 3'       | Gene Bank ID   | Product size (bp) | Annealing temperature °C |
|------------------------|------------------------|-----------------------|----------------|-------------------|--------------------------|
| 18S                    | CTCAACACGGGAAACCTCAC   | CGCTCCACCAACTAAGAACG  | NR_003278.3    | 110               | 58                       |
| 28S                    | CTAAATACCGGCACGAGACC   | TTCACGCCCTCTTGAACCTCT | NR_003279.1    | 88                | 58                       |
| <i>Ccnb1</i>           | ACAGCTGGTCGGTGTAAACG   | TGCACCATGTCGTAGTCCAG  | NM_172301.3    | 282               | 58                       |
| <i>Ccnb2</i>           | CCGACGGTGTCCAGTGATTT   | AGGTTTCTTCGCCACCTGAG  | NM_007630.2    | 141               | 58                       |
| <i>Cdk1</i>            | GAACGGCTTGGAATTTGCTCTC | AGCAGACAGGGACATCCATC  | NM_007659.3    | 108               | 58                       |
| <i>Gapdh</i>           | CGGGAAGCCCATCACGATTT   | GGTCATGAGCCCTTCCACAA  | XM_001476707.5 | 280               | 58                       |
